# Supplementary material for: A pH-responsive, endosomolytic liposome functionalized with membrane-anchoring, comb-like pseudopeptides for enhanced intracellular delivery and cancer treatment
Source: Royal Society of Chemistry journal article supplement (doi:10.1039/d2bm01087a), 2022-01-01
Supplement: d2bm01087a1.pdf [file d2bm01087a1.pdf]

## Supplementary Material

### A pH-responsive, Endosomolytic Liposome Functionalized with Membrane-anchoring, Comb-like Pseudopeptides for Enhanced Intracellular Delivery and Cancer Treatment

*Siyuan Chen<sup>a,b</sup>, Gabriella Morrison<sup>a</sup>, Wenyuan Liu<sup>b</sup>, Apanpreet Kaur Bhamra<sup>a</sup>,*

*Rongjun Chen<sup>a\*</sup>*

<sup>a</sup>. Department of Chemical Engineering, Imperial College London, South Kensington  
Campus, London, SW7 2AZ, United Kingdom

<sup>b</sup>. College of Materials Science and Engineering, Nanjing Tech University, 30 South Puzhu  
Road, Nanjing 211816, P. R. China

\*Tel: +44 (0)20 75942070. Fax: +44 (0)20 75945638. Email: [rongjun.chen@imperial.ac.uk](mailto:rongjun.chen@imperial.ac.uk)

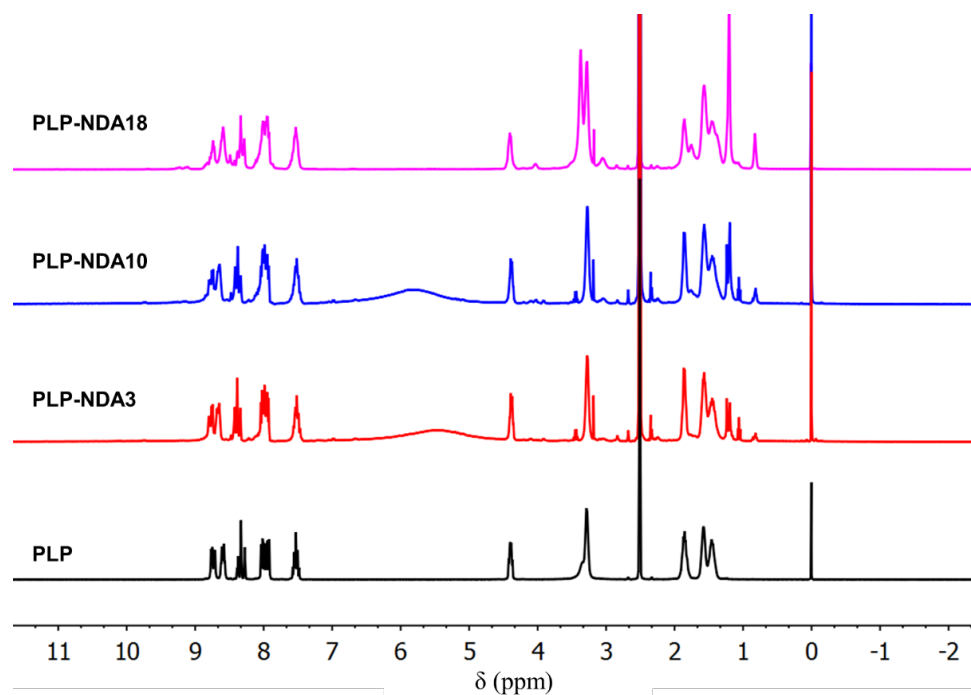

**Figure S1.**  $^1\text{H}$ -NMR spectra of PLP, PLP-NDA3, PLP-NDA10 and PLP-NDA18 in acidic form in  $\text{d}_6$ -DMSO at room temperature.

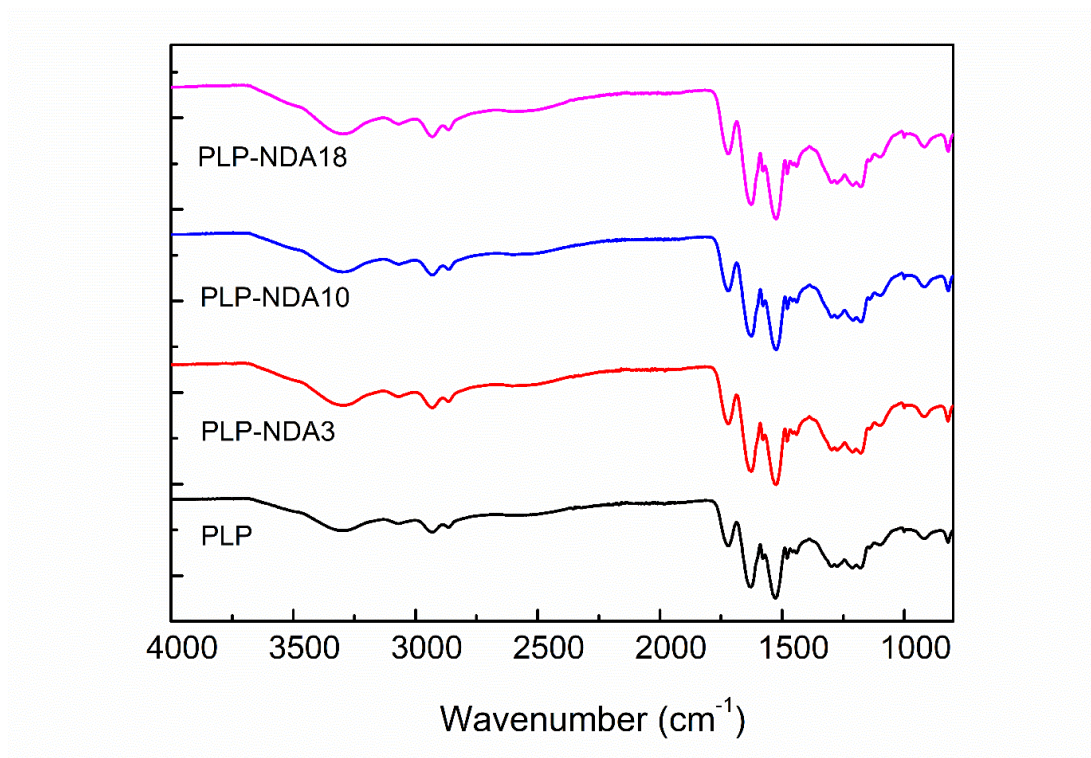

**Figure S2.** FT-IR spectra of PLP, PLP-NDA3, PLP-NDA10 and PLP-NDA18 in acidic form.

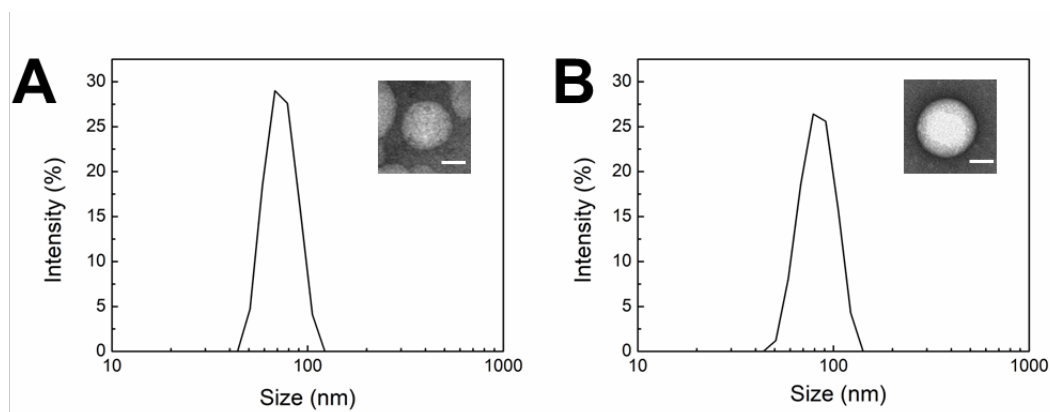

**Figure S3.** Dynamic light scattering (DLS) size distribution and transmission electron microscopy (TEM) morphology of (A) the bare liposomes (bare LP) and (B) PLP-NDA18-coated liposomes (PLP-NDA18-LP). Scale bar: 40 nm.

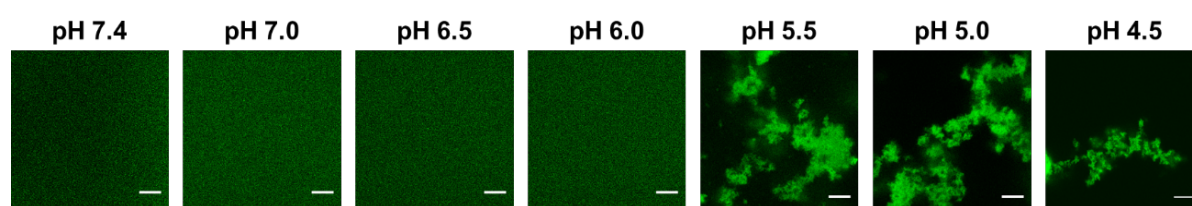

**Figure S4.** Confocal microscopy images of FITC labelled PLP-NDA18-coated liposomes at various pHs. Scale bar: 40  $\mu\text{m}$ .

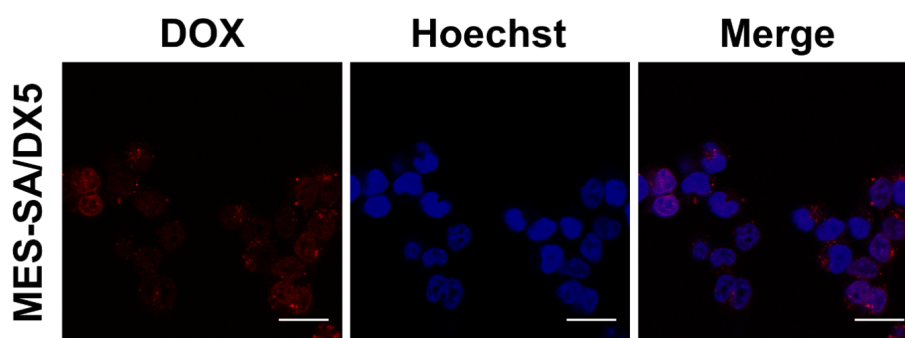

**Figure S5.** Confocal microscopy images of MES-SA/DX5 cells showing subcellular DOX distribution. Cells were treated with 2.5  $\mu\text{M}$  free DOX for 1 h before imaging (scale bar 20  $\mu\text{m}$ ).

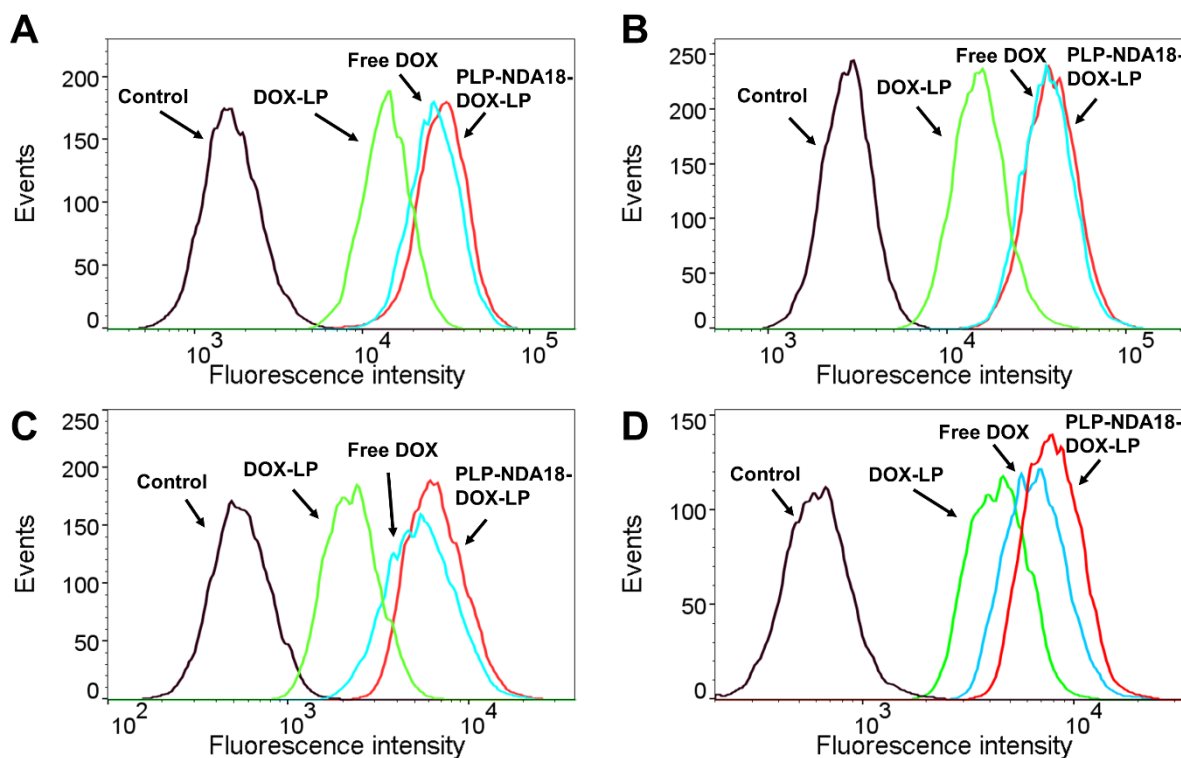

**Figure S6.** Cellular uptake of DOX quantitatively analyzed by flow cytometry and presented as representative histogram plots. All the samples were analyzed after 1 h of treatment of (A) HeLa, (B) A549, and (C) MES-SA cells with free DOX, DOX-loaded bare liposomes (DOX-LP), and DOX-loaded, PLP-NDA18-coated liposomes (PLP-NDA18-DOX-LP), respectively, at the fixed equivalent DOX dosage of 2.5  $\mu$ M. (D) MES-SA/DX5 cells were treated with free DOX, DOX-LP, and PLP-NDA18-DOX-LP, respectively, at the fixed equivalent DOX concentration of 5  $\mu$ M for 1 h before flow cytometry measurements.

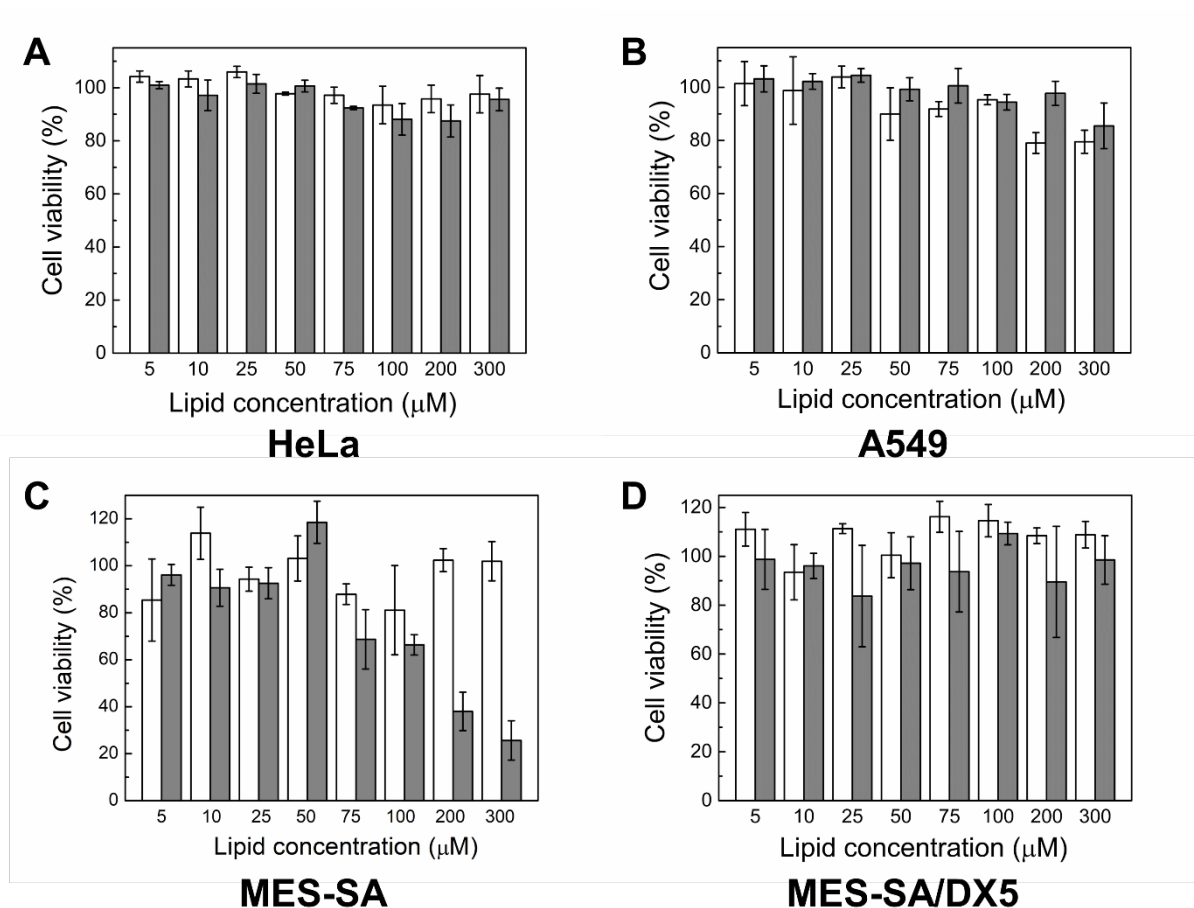

**Figure S7.** Concentration-dependent relative viabilities of (A) HeLa, (B) A549, (C) MES-SA, and (D) MES-SA/DX5 cells treated with the liposomes with (close columns) or without (open columns) PLP-NDA18 coating for 24 h as determined by Alamar Blue assay. The polymer-to-lipid ratio of the PLP-NDA18-coated liposomes was fixed at 2.85:100. Mean  $\pm$  S.D. (n=3).

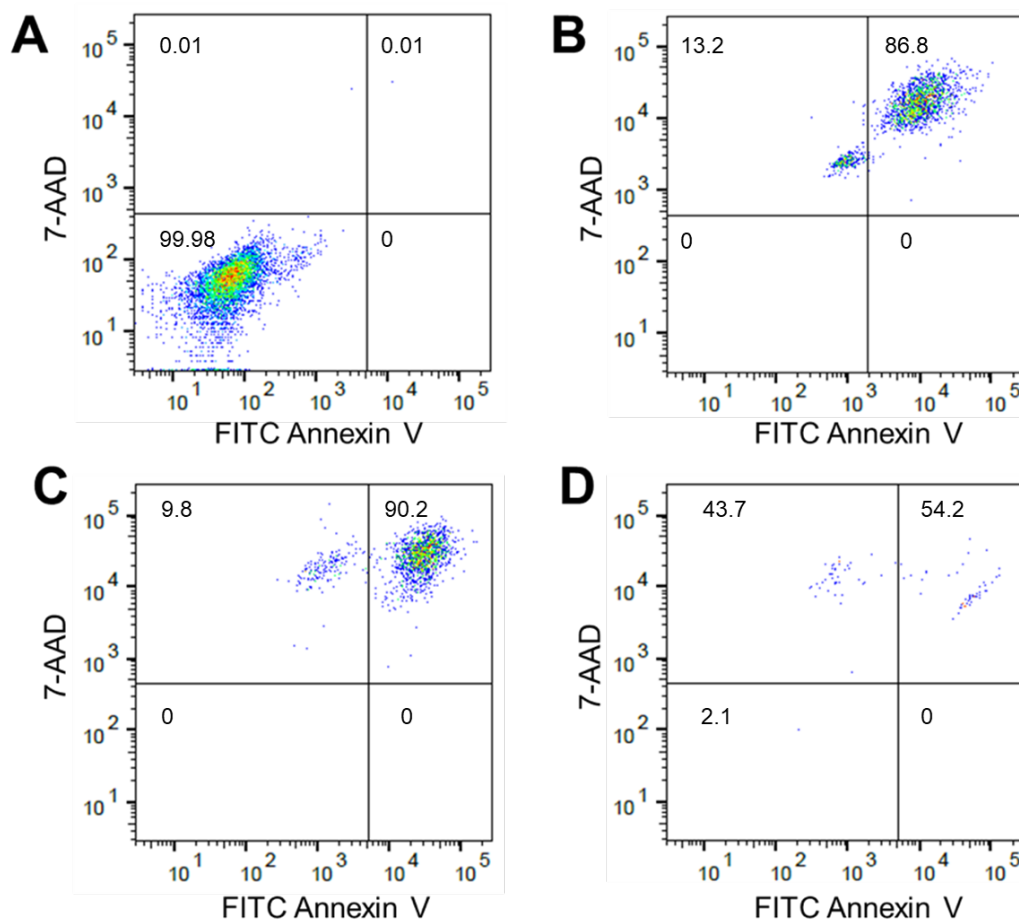

**Figure S8.** Representative flow cytometry scatterplot of A549 cells after 24 h of incubation with (A) serum-free culture medium alone, (B) free DOX, (C) DOX-loaded bare liposomes (DOX-LP), and (D) DOX-loaded, PLP-NDA18-coated liposomes (PLP-NDA18-DOX-LP). DOX dosage in free DOX solution or the liposomal samples was fixed at  $2.5 \mu\text{M}$ . Mean  $\pm$  S.D. (n=3).

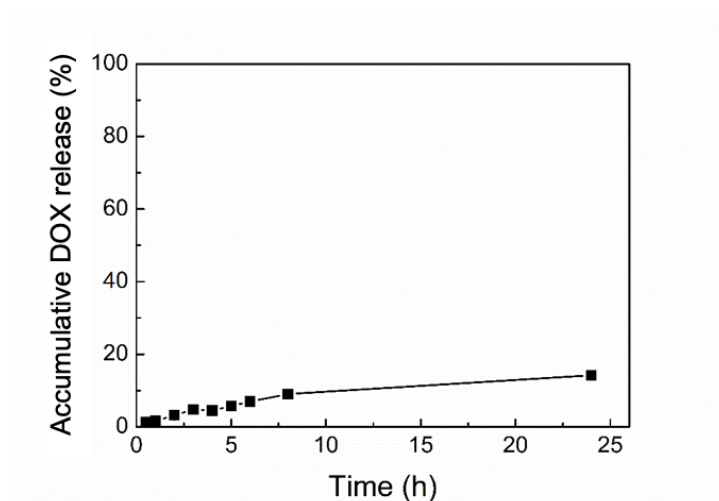

**Figure S9.** Accumulative DOX release from the DOX-loaded, PLP-NDA18-coated liposomes at pH 7.4. Mean  $\pm$  S.D. (n=3).
